# Supplementary material
Source: Springer Nature journal article supplement (https://www.springermedizin.de/resource/supplementary/13054_2011_527_MOESM5_ESM.pdf/9708594)

## Comparison of the incremental costs and effects of low molecular weight heparin versus fondaparinux for venous thromboembolism prophylaxis

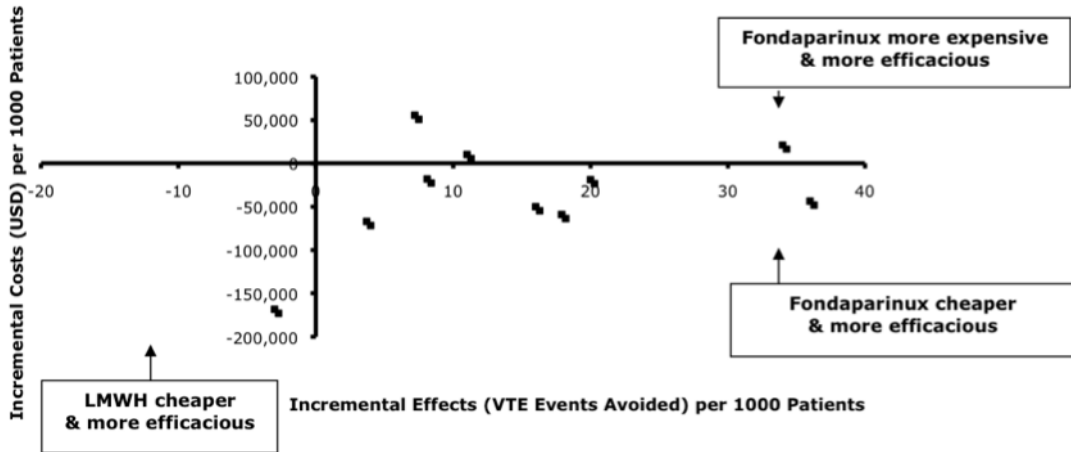

Supplement: MOESM5 [file 9708594]
